# Supplementary material
Source: Elsevier journal article supplement (https://www.sciencedirect.com/science/article/pii/S1699258X15001904)
Supplement: mmc1 [file S1699258X15001904:mmc1.doc]

**Tabla 4.**

**Estándares de calidad asistencial en niveles de prioridad**

|  | %≥7 | Media | DE | Mediana | CV  (%) |
| --- | --- | --- | --- | --- | --- |
| Deben contemplarse tres grados de prioridad asistencial en las derivaciones a las consultas de reumatología (urgente, preferente y ordinaria) | 96 | 9,1 | 1,5 | 10 | 16,5 |
| En las consultas de reumatología se definen como urgentes aquellas derivaciones en las que el médico remitente considera que dadas las características del proceso éste debe ser atendido transcurrido un tiempo que no sobrepase las 72 horas | 85 | 8,5 | 2,1 | 9 | 24,7 |
| En las consultas de reumatología se definen como preferentes aquellas derivaciones en las que el médico remitente considera que dadas las características del paciente éste debe ser atendido con una demora máxima de 15 días | 93 | 8,8 | 1,8 | 9 | 20,4 |
| En las consultas de reumatología se definen como ordinarias aquellas derivaciones en las que el médico remitente considera que dadas las características del proceso éste puede ser atendido en el plazo habitual | 96 | 9,1 | 1,5 | 10 | 16,5 |
| En las agendas de primera visita de las consultas de reumatología debe preestablecerse una carga de visitas urgentes y preferentes suficiente para cubrir las necesidades del área | 93 | 8,9 | 1,7 | 9 | 19,1 |

% ≥7: Porcentaje de participantes que otorgaron al ítem una puntuación igual o superior a 7.

DE: Desviación estándar

CV (%): Coeficiente de variación en porcentaje

**Tabla** **5. Estándares de calidad asistencial en la relación con atención primaria, con el servicio de urgencias y con otros servicios del hospital**

|  | %≥7 | Media | DE | Mediana | CV  (%) |
| --- | --- | --- | --- | --- | --- |
| Las derivaciones desde atención primaria a las consultas de reumatología deben realizarse mediante conexión informática | 95 | 8,5 | 1,4 | 9 | 16,5 |
| El servicio de reumatología debe pactar protocolos asistenciales con atención primaria | 98 | 9,1 | 1 | 9 | 11 |
| En los protocolos pactados con atención primaria debe figurar: a) los procesos incluidos en la cartera de servicios de reumatología, b) los criterios que rigen la derivación del paciente en cada proceso, c) el grado de prioridad asistencial de cada proceso, d) las normas generales de seguimiento de pacientes reumatológicos en el ámbito de atención primaria | 98 | 9,2 | 0,9 | 10 | 9,8 |
| En la solicitud de derivación desde atención primaria o desde otros servicios del propio hospital a las consultas de reumatología deben figurar un conjunto mínimo de datos: a) antecedentes personales y medicación habitual, b) motivo de consulta, c) exploración física, d) pruebas complementarias, e) tratamiento instaurado, f) orientación diagnóstica | 97 | 9,2 | 1,1 | 10 | 12 |
| En las consultas de reumatología, un reumatólogo debe realizar una gestión selectiva (filtro) de las derivaciones realizadas con carácter urgente o preferente desde atención primaria y desde otros servicios del hospital | 91 | 8,8 | 1,5 | 9 | 17 |
| El reumatólogo que ejerce la selección debe tener la potestad de cambiar el grado de prioridad asistencial, rechazar la petición de derivación o redirigirla a otro servicio | 94 | 8,9 | 1,7 | 10 | 19,1 |
| El servicio de reumatología debe ofrecer una consulta *on line* para la resolución de procesos que no requieran, indefectiblemente, de la presencia física del paciente en las consultas | 83 | 8,1 | 2 | 9 | 24,7 |
| Deben establecerse canales de comunicación entre el servicio de reumatología y la atención primaria con la finalidad de detectar y corregir, periódicamente, las desviaciones en la aplicación del protocolo de actividad asistencial | 97 | 9,1 | 1,1 | 9 | 12,2 |
| El servicio de reumatología debe implicarse en la formación continuada de los médicos de familia de su área de influencia con la finalidad de aumentar la autonomía de la atención primaria en el control del paciente reumatológico | 92 | 8,9 | 1,5 | 9 | 16,9 |
| El servicio de reumatología debe ofrecer a atención primaria un número de teléfono al que dirigirse si el médico de familia considera que debe contactar de forma rápida con el reumatólogo. | 94 | 8,9 | 1,5 | 10 | 16,9 |
| El servicio de reumatología debe realizar una encuesta de satisfacción a los médicos de su área sanitaria en relación a la asistencia prestada | 76 | 7,3 | 2,5 | 8 | 34,2 |
| El servicio de reumatología debe pactar protocolos asistenciales con el servicio de urgencias | 92 | 8,6 | 1,7 | 9 | 19,8 |
| En los protocolos asistenciales pactados con el servicio de urgencias debe figurar: a) los procesos incluidos en la cartera de servicios de reumatología, b) las normas generales de seguimiento de los pacientes tras el alta, c) los procesos susceptibles de derivación urgente o preferente a las consultas externas del servicio de reumatología, d) los procedimientos de derivación, y e) los procesos que requieren ingreso hospitalario | 95 | 8,9 | 1,3 | 9 | 14,6 |
| Desde el servicio de urgencias deben poderse cursar, por vía electrónica, derivaciones urgentes y preferentes al servicio de reumatología | 90 | 8,5 | 1,6 | 9 | 18,8 |
| Debe contemplarse la posibilidad, en casos muy seleccionados y previo contacto (personal o telefónico), de aceptar la derivación en el mismo día de pacientes visitados en el servicio de urgencias | 94 | 8,9 | 1,5 | 9 | 16,8 |
| El servicio de reumatología debe pactar protocolos asistenciales con el resto de servicios clínicos del hospital | 90 | 8,5 | 1,6 | 9 | 18,8 |
| En los protocolos pactados con el resto de servicios clínicos del hospital debe figurar: a) los procesos incluidos en la cartera de servicios de reumatología, b) los procesos susceptibles de derivación al servicio de reumatología | 97 | 8,9 | 1,3 | 9 | 14,6 |
| Debe contemplarse la posibilidad, en casos muy seleccionados y previo contacto (personal o telefónico), de aceptar la derivación a las consultas de reumatología de pacientes visitados en el mismo día en otros servicios del hospital | 91 | 8,8 | 1,7 | 9 | 19,3 |
| Debe contemplarse la posibilidad, en casos muy seleccionados y previo contacto (personal o telefónico), de derivar pacientes a otros servicios del hospital en el mismo día en que han sido visitados en las consultas de reumatología | 94 | 8,9 | 1,6 | 9 | 18 |
| El servicio de reumatología debe pactar con el servicio de farmacia circuitos de atención que aseguren la dispensación de la medicación de administración hospitalaria en el mismo día en que el paciente acude a visitarse en consultas externas | 99 | 9,3 | 1,3 | 10 | 14 |

% ≥7: Porcentaje de participantes que otorgaron al ítem una puntuación igual o superior a 7.

DE: Desviación estándar

CV (%): Coeficiente de variación en porcentaje

**Tabla 6. Estándares de calidad asistencial en proceso**

|  | %≥7 | Media | DE | Mediana | CV  (%) |
| --- | --- | --- | --- | --- | --- |
| El servicio de reumatología es el responsable de la definición de las agendas de las consultas | 100 | 9,6 | 0,7 | 10 | 7,3 |
| El servicio de reumatología debe impulsar, siempre que los recursos asistenciales lo permitan, la existencia de consultas monográficas | 94 | 8,8 | 1,6 | 9 | 18,2 |
| En las consultas de reumatología es aconsejable que existan consultas monográficas de: |  |  |  |  |  |
| - Enfermedades autoinmunes sistémicas | 93 | 8,8 | 1,6 | 9 | 18,2 |
| - Artritis de inicio | 90 | 8,8 | 1,8 | 10 | 20,4 |
| - Enfermedad ósea metabólica | 76 | 7,5 | 2,7 | 8 | 36 |
| - Reumatología pediátrica | 88 | 8,7 | 1,8 | 9 | 20,7 |
| - Artritis reumatoide | 76 | 7,8 | 2,2 | 8 | 28,2 |
| - Terapias biológicas | 72 | 7,5 | 2,4 | 8 | 32 |
| - Espondiloartritis | 85 | 8,3 | 1,8 | 9 | 21,7 |
| - Artritis psoriásica | 75 | 7,5 | 2,4 | 8 | 32 |
| - Espondilitis anquilosante | 76 | 7,5 | 2,2 | 8 | 29,3 |
| El servicio de reumatología debe impulsar, siempre que los recursos asistenciales lo permitan, la existencia de consultas multidisciplinarias | 94 | 8,9 | 1,6 | 9 | 17,8 |
| En las consultas de reumatología deben existir consultas multidisciplinarias de: |  |  |  |  |  |
| - Uveítis | 93 | 8,8 | 1,3 | 9 | 14,8 |
| - Embarazo y enfermedades reumáticas | 87 | 8,4 | 1,8 | 9 | 21,4 |
| - Enfermedades autoinmunes sistémicas | 81 | 8,1 | 2,5 | 9 | 30,9 |
| - Reumatología pediátrica | 87 | 8,2 | 2,0 | 9 | 24,4 |
| - Artritis psoriásica | 76 | 7,5 | 2,5 | 8 | 33,3 |
| El tiempo por visita en las agendas de las consultas monográficas y de las consultas multidisciplinarias debe ser superior al de las consultas generales | 91 | 8,4 | 1,6 | 9 | 19 |
| En las consultas de reumatología deben existir consultas de alta resolución (en un mismo día se realizan al paciente las exploraciones complementarias y éste recibe un diagnóstico y una orientación terapéutica) | 90 | 8,5 | 1,6 | 9 | 18,8 |
| En las consultas de reumatología debe existir una relación funcional con el hospital de día que permita, si se estima procedente, la realización de una visita en el mismo día en que se practica la infusión | 96 | 8,9 | 1,6 | 10 | 18 |
| En las consultas de reumatología debe existir una relación funcional con el servicio de radiología que permita, si se estima procedente, la realización de un estudio radiográfico inmediatamente después de que el paciente haya sido visitado | 96 | 8,9 | 1,3 | 9 | 14,6 |
| Como norma general, el tiempo medio que debe asignarse en un agenda de las consultas de reumatología es: |  |  |  |  |  |
| - Una primera visita, 30 minutos | 97 | 9,1 | 1,1 | 9 | 12,1 |
| - Una visita de resultados, 15 minutos | 93 | 8,6 | 1,7 | 9 | 19,8 |
| - Una visita sucesiva, 15 minutos | 96 | 8,9 | 1,2 | 9 | 13,5 |
| El tiempo necesario para realizar una primera visita en cada una de las siguientes enfermedades es: |  |  |  |  |  |
| - Artritis microcristalina, 20 minutos | 91 | 8,2 | 1,5 | 8 | 18,3 |
| - Artritis psoriásica, 30 minutos | 92 | 8,8 | 1,3 | 9 | 14,8 |
| - Artritis reumatoide, 30 minutos | 91 | 8,8 | 1,3 | 9 | 14,8 |
| - Artrosis, patología de partes blandas, raquialgia, 20 minutos | 88 | 8,2 | 1,6 | 9 | 19,5 |
| - Enfermedad autoinmune sistémica, 30 minutos | 92 | 8,8 | 1,5 | 9 | 17 |
| - Enfermedad ósea metabólica, 20 minutos | 92 | 8,4 | 1,4 | 8 | 16,7 |
| - Espondilitis anquilosante, 20 minutos | 92 | 8,8 | 1,3 | 9 | 14,8 |
| - Fibromialgia, 30 minutos | 76 | 7,4 | 2,6 | 8 | 35,1 |
| El tiempo necesario para realizar una visita de resultados para cada una de las siguientes enfermedades es: |  |  |  |  |  |
| - Artritis microcristalina, 15 minutos | 89 | 8,6 | 1,5 | 9 | 17,4 |
| - Artritis psoriásica, 20 minutos | 91 | 8,6 | 1,5 | 9 | 17,4 |
| - Artritis reumatoide, 20 minutos | 91 | 8,7 | 1,5 | 9 | 17,2 |
| - Artrosis, patología de partes blandas, raquialgia, 15 minutos | 88 | 8,5 | 1,5 | 9 | 17,6 |
| - Enfermedad autoinmune sistémica, 20 minutos | 95 | 8,8 | 1,3 | 9 | 14,8 |
| - Enfermedad ósea metabólica, 20 minutos | 89 | 8,5 | 1,7 | 9 | 20 |
| - Espondilitis anquilosante, 20 minutos | 94 | 8,7 | 1,4 | 9 | 16,1 |
| - Fibromialgia, 15 minutos | 77 | 7,9 | 2,2 | 9 | 27,8 |
| El tiempo necesario para realizar una visita sucesiva en cada una de las siguientes enfermedades es: |  |  |  |  |  |
| - Artritis microcristalina, 15 minutos | 92 | 8,6 | 1,4 | 9 | 16,3 |
| - Artritis psoriásica, 20 minutos | 97 | 8,9 | 1,1 | 9 | 12,4 |
| - Artritis reumatoide, 20 minutos | 97 | 8,9 | 1,1 | 9 | 12,4 |
| - Artrosis, patología de partes blandas, raquialgia, 15 minutos | 89 | 8,5 | 1,6 | 9 | 18,8 |
| - Enfermedad autoinmune sistémica, 20 minutos | 95 | 8,8 | 1,2 | 9 | 13,6 |
| - Enfermedad ósea metabólica, 15 minutos | 94 | 8,7 | 1,3 | 9 | 15 |
| - Espondilitis anquilosante,15 minutos | 89 | 8,4 | 1,5 | 9 | 17,9 |
| - Fibromialgia, 15 minutos | 79 | 7,6 | 2,7 | 8 | 35,5 |
| El tiempo necesario para realizar una visita de segunda opinión es de 35 minutos | 86 | 8,2 | 2,1 | 9 | 25,6 |
| La demora máxima que puede asumirse en las consultas de reumatología para la realización de las visitas es: |  |  |  |  |  |
| - Una primera visita, 4 semanas | 88 | 8,3 | 1,8 | 8 | 21,7 |
| - Una visita de resultado, 4 semanas | 88 | 8,3 | 1,8 | 9 | 21,7 |
| - Una visita sucesiva, 8 semanas | 87 | 7,7 | 2,2 | 8 | 28,6 |
| La demora máxima para la realización de una primera visita de las siguientes enfermedades es: |  |  |  |  |  |
| - Artritis psoriásica, 2 semanas | 89 | 8,3 | 1,9 | 9 | 22,9 |
| - Artritis reumatoide, 2 semanas | 86 | 8,2 | 1,9 | 9 | 23,2 |
| - Enfermedad autoinmune sistémica, 2 semanas | 86 | 8,3 | 2 | 9 | 24,1 |
| - Enfermedad ósea metabólica, 8 semanas | 83 | 8,1 | 1,8 | 8 | 22,2 |
| - Espondilitis anquilosante, 3 semanas | 88 | 8,2 | 1,9 | 9 | 23,2 |
| El número máximo de primeras visitas que debe realizar un reumatólogo en una jornada laboral es de: |  |  |  |  |  |
| - En las consultas de reumatología ubicadas en el hospital, 4 | 97 | 8,7 | 1,3 | 9 | 14,9 |
| - En las consultas de reumatología ubicadas en un centro de especialidades, 6 | 78 | 7,8 | 2,2 | 8 | 28,2 |
| El número máximo de segundas visitas (visitas de resultados y visitas sucesivas) que debe realizar un reumatólogo en una jornada laboral es de: |  |  |  |  |  |
| - En las consultas de reumatología ubicadas en el hospital, 11 | 91 | 8,5 | 1,4 | 9 | 16,5 |
| - En las consultas de reumatología ubicadas en un centro de especialidades, 12 | 82 | 8,1 | 1,8 | 8 | 22,2 |
| El número máximo de días de consultas por semana que debe realizar un reumatólogo es de 4 | 97 | 9 | 1,4 | 10 | 15,6 |
| El número máximo de horas de consulta diaria que debe realizar un reumatólogo es de 5 | 100 | 9,2 | 1 | 9 | 10,9 |
| Como norma general, el tiempo en que deben ser controlados los pacientes en las consultas externas de reumatología, una vez establecido el diagnóstico, en cada una de las siguientes enfermedades es de: |  |  |  |  |  |
| - Artritis microcristalina, 6 meses | 88 | 8,3 | 1,6 | 9 | 19,3 |
| - Artritis psoriásica, 3 meses | 94 | 8,8 | 1,2 | 9 | 13,6 |
| - Artritis reumatoide, 3 meses | 92 | 8,8 | 1,3 | 9 | 14,8 |
| - Enfermedad autoinmune sistémica, 3 meses | 95 | 8,8 | 1,2 | 9 | 13,6 |
| - Enfermedad ósea metabólica, 12 meses | 86 | 8,4 | 1,6 | 9 | 19 |
| - Espondilitis anquilosante, 4 meses | 89 | 8,3 | 1,7 | 9 | 20,5 |
| En las consultas externas de reumatología se contempla que puedan realizarse las siguientes técnicas diagnósticas: |  |  |  |  |  |
| - Artrocentesis | 100 | 9,7 | 0,6 | 10 | 6,2 |
| - Artrocentesis guiada por ecografía | 100 | 9,3 | 1 | 10 | 10,8 |
| - Análisis cristalográfico del líquido sinovial | 99 | 9,4 | 0,9 | 10 | 9,6 |
| - Ecografía de una región anatómica | 96 | 9,1 | 1,3 | 10 | 14,3 |
| - Ecografía de la arteria temporal | 77 | 7,6 | 2,5 | 8 | 32,9 |
| - Evaluación de la actividad inflamatoria articular mediante ecografía | 91 | 8,8 | 1,6 | 9 | 18,1 |
| - Capilaroscopia | 96 | 9 | 1,4 | 9 | 15,6 |
| El tiempo necesario para realizar las siguientes técnicas diagnósticas es de: |  |  |  |  |  |
| - Artrocentesis, 10 minutos | 92 | 8,6 | 1,8 | 9 | 20,9 |
| - Artrocentesis guiada por ecografía, 15 minutos | 91 | 8,5 | 1,7 | 9 | 20 |
| - Análisis cristalográfico del líquido sinovial, 10 minutos | 95 | 8,7 | 1,5 | 9 | 17,2 |
| - Ecografía de una región anatómica, 15 minutos | 86 | 8,3 | 1,8 | 9 | 21,7 |
| - Ecografía de la arteria temporal, 15 minutos | 85 | 7,9 | 2,4 | 9 | 30,4 |
| - Evaluación de la actividad inflamatoria articular mediante ecografía, 20 minutos | 83 | 8,2 | 2 | 9 | 24,4 |
| - Capilaroscopia, 15 minutos | 94 | 8,6 | 1,8 | 9 | 21 |
| En las consultas externa de reumatología debe ser posible realizar las siguientes técnicas terapéuticas: |  |  |  |  |  |
| - Inyección intrarticular | 95 | 9,7 | 0,6 | 10 | 6,2 |
| - Inyección intrarticular con control ecográfico | 91 | 9,2 | 1,1 | 10 | 12 |
| - Infiltración de partes blandas | 95 | 9,7 | 0,6 | 10 | 6,2 |
| - Infiltración de partes blandas con control ecográfico | 92 | 9,1 | 1,5 | 10 | 16,5 |
| El tiempo necesario para realizar las siguientes técnicas terapéuticas es de: |  |  |  |  |  |
| - Inyección intrarticular, 10 minutos | 95 | 9 | 1,4 | 9 | 15,6 |
| - Inyección intrarticular con control ecográfico, 15 minutos | 91 | 8,9 | 1,51 | 9 | 16,9 |
| - Infiltración de partes blandas, 10 minutos | 95 | 9 | 1,4 | 9 | 15,6 |
| - Infiltración de partes blandas con control ecográfico, 15 minutos | 92 | 8,9 | 1,5 | 9 | 16,9 |
| El tiempo necesario para realizar las siguientes actividades es de: |  |  |  |  |  |
| - Redactar un informe de alta, 15 minutos | 89 | 8,5 | 1,9 | 9 | 22,4 |
| - Redactar un informe de situación, 10 minutos | 94 | 8,5 | 1,7 | 9 | 20 |
| - Redactar un informe de incapacidad, 20 minutos | 88 | 8,4 | 1,9 | 9 | 22,6 |
| - Redactar un informe de solicitud de medicación en situaciones especiales, 15 minutos | 91 | 8,6 | 1,8 | 9 | 20,9 |
| - Recabar un consentimiento informado, 10 minutos | 92 | 8,5 | 1,7 | 9 | 20 |
| - Informar acerca de un nuevo tratamiento, 10 minutos | 94 | 8,5 | 1,8 | 9 | 21,2 |
| - Atender llamadas de los pacientes a lo largo de un día, 30 minutos | 88 | 8,3 | 1,9 | 9 | 22,9 |

% ≥7: Porcentaje de participantes que otorgaron al ítem una puntuación igual o superior a 7.

DE: Desviación estándar

CV (%): Coeficiente de variación en porcentaje

**Tabla 7. Estándares de calidad asistencial en enfermería reumatológica**

|  | %≥7 | Media | DE | Mediana | CV  (%) |
| --- | --- | --- | --- | --- | --- |
| Las consultas de reumatología deben contar con al menos una enfermera especializada | 100 | 9,5 | 0,8 | 10 | 8,4 |
| En las consultas de reumatología el número máximo de reumatólogos que pueden trabajar conjuntamente con una enfermera es de 3 | 84 | 8,3 | 1,7 | 9 | 20,5 |
| En las consultas de reumatología el número máximo de reumatólogos que pueden trabajar conjuntamente con una auxiliar de clínica es de 3 | 77 | 7,7 | 2,1 | 8 | 26,2 |
| En las consultas de reumatología debe haber consulta de enfermería reumatológica | 97 | 9,4 | 1,1 | 10 | 11,7 |
| En la consulta de enfermería reumatológica, la enfermera: |  |  |  |  |  |
| - Realiza promoción de la salud del paciente | 99 | 9,4 | 1 | 10 | 10,6 |
| - Explica al paciente las características de su enfermedad y de su tratamiento | 93 | 8,8 | 1,9 | 9 | 21,6 |
| - Conciencia al paciente acerca de la cronicidad de su enfermedad | 93 | 9 | 1,6 | 10 | 17,8 |
| - Favorece el cumplimiento terapéutico | 100 | 9,5 | 0,8 | 10 | 8,4 |
| - Entrena al paciente en la administración de fármacos | 100 | 9,7 | 0,6 | 10 | 6,2 |
| - Administra fármacos prescritos por el reumatólogo | 97 | 9,5 | 9,5 | 10 | 13,7 |
| - Toma constantes y registra el índice de masa corporal | 99 | 9,4 | 9,4 | 10 | 9,6 |
| - Revisa pruebas complementarias con la finalidad de aumentar la seguridad del paciente | 96 | 9,1 | 1,3 | 10 | 14,3 |
| - Facilita el cumplimiento de los cuestionarios | 100 | 9,5 | 0,8 | 10 | 8,4 |
| - Aplica vendajes, inmovilizaciones y férulas de reposo | 90 | 8,6 | 2 | 9 | 23,3 |
| - Realiza curas de úlceras | 90 | 8,8 | 1,8 | 9 | 20,4 |
| - Practica extracciones sanguíneas | 96 | 9,3 | 1,5 | 10 | 16,1 |
| - Realiza la prueba de la tuberculina | 91 | 8,9 | 2 | 10 | 22,5 |
| - Realiza el test de Schrimer | 91 | 9 | 1,7 | 10 | 18,9 |
| - Realiza encuestas dietéticas | 88 | 8,8 | 1,9 | 9 | 21,6 |
| - Evalúa riesgo de fractura (índice FRAX) | 88 | 8,5 | 2,2 | 9 | 25,9 |
| - Evalúa riesgo cardiovascular | 84 | 8,3 | 2,5 | 9 | 30,1 |
| La consulta de enfermería debe tener una agenda propia | 99 | 9,4 | 1 | 10 | 10,6 |
| Cada uno de los actos asistenciales realizados por la enfermera en la consulta de enfermería reumatológica debe quedar reflejado en la historia clínica del paciente | 96 | 9,4 | 1,3 | 10 | 13,8 |
| En las consultas de reumatología, la enfermera puede citar visitas sucesivas a la agenda del reumatólogo si cuenta con su aquiescencia | 91 | 8,8 | 1,6 | 9 | 18,2 |
| La enfermera de las consultas de reumatología centraliza las consultas telefónicas de los pacientes | 99 | 9,4 | 1 | 10 | 10,6 |
| El número máximo de visitas que debe realizar una enfermera en una jornada laboral es de 15 | 88 | 8,7 | 1,5 | 9 | 17,2 |
| El número máximo de días de consulta que debe realizar una enfermera por semana es de 5 | 88 | 8,7 | 1,6 | 9 | 18,4 |
| El número máximo de horas de consulta diaria que debe realizar una enfermera es de 5 | 96 | 8,9 | 1,2 | 9 | 13,5 |
| La enfermera adscrita al servicio de reumatología debe acreditar un conocimiento suficiente de la especialidad antes de ejercer las funciones inherentes a la consulta de enfermería reumatológica | 99 | 9,5 | 0,8 | 10 | 8,4 |

% ≥7: Porcentaje de participantes que otorgaron al ítem una puntuación igual o superior a 7.

DE: Desviación estándar

CV (%): Coeficiente de variación en porcentaje

**Tabla 8. Estándares de calidad asistencial en docencia e investigación**

|  | %≥7 | Media | DE | Mediana | CV  (%) |
| --- | --- | --- | --- | --- | --- |
| Las consultas de reumatología constituyen un espacio docente para las prácticas clínicas de los estudiantes y para la formación de los residentes | 100 | 9,5 | 0,8 | 10 | 8,4 |
| La actividad docente debe registrase de forma específica, diferenciada de la actividad asistencial | 99 | 9,3 | 1,1 | 10 | 11,8 |
| El tiempo que dedica un reumatólogo a la docencia de grado en una jornada laboral en consultas es de 60 minutos | 83 | 8,1 | 2 | 8 | 24,7 |
| El tiempo en minutos que dedica un reumatólogo a la docencia de residentes en una jornada laboral en consultas es de 120 minutos | 86 | 8,2 | 1,9 | 9 | 23,2 |
| El número máximo de estudiantes de grado que debe asignarse a un reumatólogo en un despacho de consultas es de 1 | 95 | 8,9 | 1,5 | 10 | 16,9 |
| El número máximo de residentes en formación que puede asignarse a un reumatólogo en un despacho de consultas es de 1 | 98 | 9,1 | 1,2 | 10 | 13,2 |
| El tiempo asignado para cada visita a un reumatólogo con actividad docente debe ser mayor que el de un reumatólogo que únicamente realiza actividad asistencial | 95 | 9,2 | 1,3 | 10 | 14,1 |
| Los residentes de cuarto año de la especialidad de reumatología deben tener agenda propia en consultas | 91 | 8,9 | 2,1 | 10 | 23,6 |
| Los pacientes deben conocer que se está realizando actividad docente en el despacho en el que son atendidos | 90 | 8,7 | 1,6 | 9 | 18,4 |
| Los pacientes deben conocer que son atendidos por especialistas en formación | 91 | 8,5 | 1,7 | 9 | 20 |
| En un hospital universitario todos los miembros del servicio de reumatología deben llevar a cabo actividad docente con estudiantes de grado en consultas | 86 | 8,2 | 2,3 | 9 | 28 |
| En las consultas de reumatología deben habilitarse agendas específicas para los pacientes incluidos en ensayos clínicos | 93 | 8,9 | 1,7 | 10 | 19,1 |
| El tiempo por visita en las agendas de las consultas de ensayos clínicos debe ser superior al de las consultas generales | 97 | 9,3 | 1,1 | 10 | 11,8 |

% ≥7: Porcentaje de participantes que otorgaron al ítem una puntuación igual o superior a 7.

DE: Desviación estándar

CV (%): Coeficiente de variación en porcentaje

**Tabla 9. Estándares de calidad asistencial en cómputo de actividad**

|  | %≥7 | Media | DE | Mediana | CV  (%) |
| --- | --- | --- | --- | --- | --- |
| El índice de resolución (relación primeras visitas/visitas sucesivas) debe ajustarse por las características de la especialidad de reumatología | 100 | 9,6 | 0,7 | 10 | 7,3 |
| Las visitas realizadas sin cita previa deben computar a todos los efectos como actividad asistencial | 100 | 9,8 | 0,4 | 10 | 4,1 |
| La redacción de informes debe computar a todos los efectos como actividad asistencial | 99 | 9,6 | 0,9 | 10 | 9,4 |
| Las consultas telefónicas de los pacientes deben computar a todos los efectos como actividad asistencial | 99 | 9,5 | 10 | 10 | 10,5 |
| Las consultas *on line* deben computar a todos los efectos como actividad asistencial | 99 | 9,6 | 0,8 | 10 | 8,3 |
| Las técnicas propias de la especialidad de reumatología deben considerarse de forma específica (diferenciada de la visita) en el cómputo de la actividad asistencial | 99 | 9,6 | 0,8 | 10 | 8,3 |
| La actividad realizada en las consultas de ensayos clínicos debe computarse de forma diferenciada de la actividad asistencial habitual | 94 | 9,1 | 1,7 | 10 | 18,7 |
| La actividad de la consulta de enfermería debe imputarse al servicio de reumatología | 99 | 9,6 | 1,2 | 10 | 12,5 |

% ≥7: Porcentaje de participantes que otorgaron al ítem una puntuación igual o superior a 7.

DE: Desviación estándar

CV (%): Coeficiente de variación en porcentaje
